# Supplementary material
Source: PubMed Central journal article supplement (PMC9850790)
Supplement: NIHMS1858733-supplement-Appendix.pdf [file NIHMS1858733-supplement-Appendix.pdf]

**Appendix**  
**Social Needs Resource Connections: A Systematic Review of Barriers, Facilitators, and Evaluation**  
**Steeves-Reece et al.**

**Appendix Table 1.** Systematic Mixed Studies Review Search Strategy

| <b>PubMed (MEDLINE) Search Strategy</b>                                                                                                                                                                                                                                                          |
|--------------------------------------------------------------------------------------------------------------------------------------------------------------------------------------------------------------------------------------------------------------------------------------------------|
| <b>Concept #1 – Screening</b>                                                                                                                                                                                                                                                                    |
| mass screening [MeSH Terms] OR screening [Title/Abstract] OR surveys and questionnaires [MeSH Terms] OR needs assessment [MeSH Terms] OR needs assessment [Title/Abstract] OR assessing [Title/Abstract] OR identifying [Title/Abstract]                                                         |
| <b>Concept #2 – Social Needs</b>                                                                                                                                                                                                                                                                 |
| social determinants of health [MeSH Terms] OR social determinants of health [Title/Abstract] OR health-related social needs [Title/Abstract] OR social needs [Title/Abstract] OR social risks [Title/Abstract] OR food [Title/Abstract] OR housing [Title/Abstract] OR violence (Title/Abstract) |
| <b>Concept #3 – Referral</b>                                                                                                                                                                                                                                                                     |
| referral and consultation [MeSH Terms] OR referral [Title/Abstract] OR patient navigation [MeSH Terms] OR navigation [Title/Abstract] OR navigating [Title/Abstract] OR social support [MeSH Terms] OR connecting [Title/Abstract] OR linking [Title/Abstract]                                   |
| <b>Additional Filters</b>                                                                                                                                                                                                                                                                        |
| <ul style="list-style-type: none"> <li>• English</li> <li>• Articles published from 10/01/2015 through 12/23/2020</li> </ul>                                                                                                                                                                     |

**Final Search:**

Concept #1 AND Concept #2 AND Concept #3

**Appendix**  
**Social Needs Resource Connections: A Systematic Review of Barriers, Facilitators, and Evaluation**  
**Steeves-Reece et al.**

**Appendix Table 2.** Mixed Methods Appraisal Tool (MMAT) Results<sup>a</sup>

|                                       | Qualitative      |     |     |     |     | RCT |     |     |     |     | Non-Randomized |     |     |     |     | Descriptive |     |     |     |     | Mixed Methods |     |     |     |     |
|---------------------------------------|------------------|-----|-----|-----|-----|-----|-----|-----|-----|-----|----------------|-----|-----|-----|-----|-------------|-----|-----|-----|-----|---------------|-----|-----|-----|-----|
|                                       | 1.1 <sup>b</sup> | 1.2 | 1.3 | 1.4 | 1.5 | 2.1 | 2.2 | 2.3 | 2.4 | 2.5 | 3.1            | 3.2 | 3.3 | 3.4 | 3.5 | 4.1         | 4.2 | 4.3 | 4.4 | 4.5 | 5.1           | 5.2 | 5.3 | 5.4 | 5.5 |
| Bottino (2017) <sup>29</sup>          |                  |     |     |     |     |     |     |     |     |     |                |     |     |     | Y   | Y           | Y   | Y   | Y   |     |               |     |     |     |     |
| Fargo (2017) <sup>30</sup>            |                  |     |     |     |     |     |     |     |     |     |                |     |     |     | Y   | Y           | Y   | Y   | Y   |     |               |     |     |     |     |
| Fox (2016) <sup>31</sup>              |                  |     |     |     |     |     |     |     |     |     |                |     |     |     | Y   | Y           | Y   | Y   | Y   |     |               |     |     |     |     |
| Hassan (2015) <sup>32</sup>           |                  |     |     |     |     |     |     |     |     |     |                |     |     |     | Y   | Y           | Y   | Y   | Y   |     |               |     |     |     |     |
| Polk (2020) <sup>33</sup>             |                  |     |     |     |     |     |     |     |     |     |                |     |     |     | Y   | Y           | Y   | Y   | Y   |     |               |     |     |     |     |
| Power-Hays (2019) <sup>34</sup>       |                  |     |     |     |     |     |     |     |     |     |                |     |     |     | Y   | Y           | Y   | Y   | Y   |     |               |     |     |     |     |
| Manian (2020) <sup>35</sup>           |                  |     |     |     |     |     |     |     |     |     |                |     |     |     | Y   | Y           | Y   | Y   | Y   |     |               |     |     |     |     |
| Smith A (2020) <sup>36</sup>          |                  |     |     |     |     |     |     |     |     |     |                |     |     |     | Y   | Y           | Y   | Y   | Y   |     |               |     |     |     |     |
| Smith S (2017) <sup>37</sup>          |                  |     |     |     |     |     |     |     |     |     |                |     |     |     | Y   | Y           | Y   | Y   | Y   |     |               |     |     |     |     |
| Uwemedimo (2018) <sup>38</sup>        |                  |     |     |     |     |     |     |     |     |     |                |     |     |     | Y   | Y           | Y   | C   | Y   |     |               |     |     |     |     |
| Fiori (2020) <sup>39</sup>            |                  |     |     |     |     |     |     |     |     |     |                |     |     |     | Y   | C           | Y   | C   | Y   |     |               |     |     |     |     |
| Nguyen (2016) <sup>40</sup>           |                  |     |     |     |     |     |     |     |     |     |                |     |     |     | Y   | C           | Y   | C   | C   |     |               |     |     |     |     |
| Martel (2018) <sup>41</sup>           |                  |     |     |     |     |     |     |     |     |     |                |     |     |     | C   | C           | Y   | C   | Y   |     |               |     |     |     |     |
| Fritz (2020) <sup>42</sup>            |                  |     |     |     |     |     |     |     |     |     |                |     |     |     | Y   | N           | Y   | N   | Y   |     |               |     |     |     |     |
| Knowles (2018) <sup>52</sup>          | Y                | Y   | C   | Y   | Y   |     |     |     |     |     |                |     |     |     | Y   | Y           | Y   | Y   | Y   |     |               |     |     |     |     |
| Ray (2020) <sup>53</sup>              | N                | N   | C   | Y   | N   |     |     |     |     |     |                |     |     |     | Y   | Y           | Y   | N   | Y   |     |               |     |     |     |     |
| Cullen (2020) <sup>43</sup>           | Y                | Y   | Y   | Y   | Y   |     |     |     |     |     |                |     |     |     |     |             |     |     |     |     |               |     |     |     |     |
| Cusack (2020) <sup>44</sup>           | Y                | Y   | Y   | Y   | Y   |     |     |     |     |     |                |     |     |     |     |             |     |     |     |     |               |     |     |     |     |
| Hsu (2020) <sup>45</sup>              | Y                | Y   | Y   | Y   | Y   |     |     |     |     |     |                |     |     |     |     |             |     |     |     |     |               |     |     |     |     |
| Marpadga (2019) <sup>46</sup>         | Y                | Y   | Y   | Y   | Y   |     |     |     |     |     |                |     |     |     |     |             |     |     |     |     |               |     |     |     |     |
| Orr (2019) <sup>47</sup>              | Y                | Y   | Y   | Y   | Y   |     |     |     |     |     |                |     |     |     |     |             |     |     |     |     |               |     |     |     |     |
| Palakshappa (2017b) <sup>c 48</sup>   | Y                | Y   | Y   | Y   | Y   |     |     |     |     |     |                |     |     |     |     |             |     |     |     |     |               |     |     |     |     |
| Hamity (2018) <sup>49</sup>           | Y                | C   | Y   | Y   | C   |     |     |     |     |     |                |     |     |     |     |             |     |     |     |     |               |     |     |     |     |
| Zhu (2020) <sup>50</sup>              | Y                | C   | C   | Y   | Y   |     |     |     |     |     |                |     |     |     |     |             |     |     |     |     |               |     |     |     |     |
| Emengo (2020) <sup>51</sup>           | Y                | N   | Y   | Y   | C   |     |     |     |     |     |                |     |     |     |     |             |     |     |     |     |               |     |     |     |     |
| Gottlieb (2020) <sup>58</sup>         |                  |     |     |     |     | Y   | Y   | Y   | Y   | Y   |                |     |     |     |     |             |     |     |     |     |               |     |     |     |     |
| Garg (2015) <sup>59</sup>             |                  |     |     |     |     | C   | Y   | Y   | Y   | Y   |                |     |     |     |     |             |     |     |     |     |               |     |     |     |     |
| Gottlieb (2016&2018) <sup>60,61</sup> |                  |     |     |     |     | N   | Y   | N   | N   | Y   |                |     |     |     |     |             |     |     |     |     |               |     |     |     |     |
| Swavely (2019) <sup>54</sup>          | Y                | Y   | Y   | Y   | Y   |     |     |     |     |     |                |     |     |     | Y   | C           | Y   | Y   | Y   | Y   | Y             | Y   | Y   | Y   |     |
| Montgomery (2020) <sup>55</sup>       | Y                | C   | Y   | Y   | Y   |     |     |     |     |     |                |     |     |     | Y   | Y           | Y   | Y   | Y   | Y   | Y             | Y   | Y   | Y   |     |
| Palakshappa (2017a) <sup>c 56</sup>   | Y                | Y   | Y   | Y   | Y   |     |     |     |     |     |                |     |     |     | Y   | C           | Y   | C   | Y   | Y   | Y             | Y   | Y   | Y   |     |
| Berkowitz (2019) <sup>57</sup>        | Y                | Y   | Y   | Y   | Y   |     |     |     |     |     | Y              | Y   | Y   | N   | Y   |             |     |     |     |     | Y             | Y   | Y   | Y   |     |
| Schickedanz (2019) <sup>62</sup>      |                  |     |     |     |     |     |     |     |     |     | Y              | Y   | Y   | Y   | Y   |             |     |     |     |     |               |     |     |     |     |

<sup>a</sup>“Y” = Yes – study adheres criterion; “N” = No – study doesn’t adhere to criterion; “C” = Can’t tell – study doesn’t include enough information to make a clear judgement about criterion. Detailed descriptions of MMAT criteria are here:

[http://mixedmethodsappraisaltoolpublic.pbworks.com/w/file/fetch/127916259/MMAT\\_2018\\_criteria-manual\\_2018-08-01\\_ENG.pdf](http://mixedmethodsappraisaltoolpublic.pbworks.com/w/file/fetch/127916259/MMAT_2018_criteria-manual_2018-08-01_ENG.pdf)

**Appendix**  
**Social Needs Resource Connections: A Systematic Review of Barriers, Facilitators, and Evaluation**  
**Steeves-Reece et al.**

<sup>b</sup>MMAT methodological quality criteria:

- 1.1. – Is the qualitative approach appropriate to answer the research question?
- 1.2. – Are the qualitative data collection methods adequate to address the research question?
- 1.3. – Are the findings adequately derived from the data?
- 1.4. – Is the interpretation of results sufficiently substantiated by data?
- 1.5. – Is there coherence between qualitative data sources, collection, analysis and interpretation?
- 2.1. – Is randomization appropriately performed?
- 2.2. – Are the groups comparable at baseline?
- 2.3. – Are there complete outcome data?
- 2.4. – Are outcome assessors blinded to the intervention provided?
- 2.5. – Did the participants adhere to the assigned intervention?
- 3.1. – Are the participants representative of the target population?
- 3.2. – Are measurements appropriate regarding both the outcome and intervention (or exposure)?
- 3.3. – Are there complete outcome data?
- 3.4. – Are the confounders accounted for in the design and analysis?
- 3.5. – During the study period, is the intervention administered (or exposure occurred) as intended?
- 4.1. – Is the sampling strategy relevant to address the research question?
- 4.2. – Is the sample representative of the target population?
- 4.3. – Are the measurements appropriate?
- 4.4. – Is the risk of nonresponse bias low?
- 4.5. – Is the statistical analysis appropriate to answer the research question?
- 5.1. – Is there an adequate rationale for using a mixed methods design to address the research question?
- 5.2. – Are the different components of the study effectively integrated to answer the research question?
- 5.3. – Are the outputs of the integration of qualitative and quantitative components adequately interpreted?
- 5.4. – Are divergences and inconsistencies between quantitative and qualitative results adequately addressed?
- 5.5. – Do the different components of the study adhere to the quality criteria of each tradition of the methods involved?

<sup>c</sup>While Palakshappa 2017a & 2017b articles came from the same study (i.e., focusing on the same intervention in the same setting), the 2017b article was qualitative and the 2017a article applied mixed methods.

**Appendix**  
**Social Needs Resource Connections: A Systematic Review of Barriers, Facilitators, and Evaluation**  
**Steeves-Reece et al.**

**Appendix Table 3.** Study Participants and Settings (n=32 studies)

| <b>Author/year</b>               | <b>Patient Population<sup>a</sup></b>                                       | <b>Exclusion Criteria</b>                                  | <b>Sample Size</b>          | <b>Setting</b>                                                | <b>U.S. State</b>         | <b>Geography</b> |
|----------------------------------|-----------------------------------------------------------------------------|------------------------------------------------------------|-----------------------------|---------------------------------------------------------------|---------------------------|------------------|
| Smith A (2020) <sup>36</sup>     | Pts of all ages                                                             | Unspecified                                                | 2,314                       | Large health system (16 primary care clinics)                 | Massachusetts             | Unspecified      |
| Manian (2020) <sup>35</sup>      | Pts of all ages                                                             | Pts w/o social needs<br>Pts with missing data              | 38,404                      | Hospitals & clinics;<br>FQHCs & academic medical centers      | Nationwide<br>“11 states” | Unspecified      |
| Martel (2018) <sup>41</sup>      | Pts visiting the ED                                                         | N/A                                                        | 1,519                       | County ED                                                     | Minnesota                 | Urban            |
| Schickedanz (2019) <sup>62</sup> | Adult pts                                                                   | Not in top 1% of care utilization                          | 34,225                      | KP Southern California                                        | California                | Unspecified      |
| Marpadga (2019) <sup>46</sup>    | Adult pts w/diabetes                                                        | Non-English or Spanish spkrs                               | 240 total;<br>31 qual       | Hospital-based diabetes clinic                                | California                | Urban            |
| Zhu (2020) <sup>50</sup>         | Adult pts                                                                   | Unspecified                                                | 19                          | Hospital-affiliated primary care center & children’s hospital | Rhode Island              | Urban            |
| Berkowitz (2019) <sup>57</sup>   | Adult pts                                                                   | Unable to complete screening; Non-English or Spanish spkrs | 141 quant;<br>80 qual       | 3 academic primary care clinics                               | Massachusetts             | Urban            |
| Hamity (2018) <sup>49</sup>      | Adult Medicare pts, w/complex needs: Georgia; primary care panel: Northwest | Unspecified                                                | 10 Georgia;<br>11 Northwest | KP Georgia & Northwest                                        | Georgia & “Northwest”     | Unspecified      |

**Appendix**  
**Social Needs Resource Connections: A Systematic Review of Barriers, Facilitators, and Evaluation**  
**Steeves-Reece et al.**

|                                 |                                               |                                                                                                       |                                                |                                                |                              |             |
|---------------------------------|-----------------------------------------------|-------------------------------------------------------------------------------------------------------|------------------------------------------------|------------------------------------------------|------------------------------|-------------|
| Nguyen (2016) <sup>40</sup>     | Adult pts >60 w/diabetes                      | Non-English or Spanish spkrs; Not Hispanic; Does not have diabetes                                    | 28 total; 18 qual                              | FQHC                                           | California                   | Unspecified |
| Swavely (2019) <sup>54</sup>    | Quant: Adult pts >18<br>Qual: Adult pts 33-69 | Unspecified                                                                                           | 3,860 total; 123 analysis of interest; 89 qual | Hospital                                       | Pennsylvania                 | Urban       |
| Hsu (2020) <sup>45</sup>        | Adult pts >18                                 | Non-English or Spanish spkrs                                                                          | 102                                            | CHC                                            | California                   | Urban       |
| Smith S (2017) <sup>37</sup>    | Adult pts >18                                 | Unspecified                                                                                           | 463                                            | Student-run clinics                            | California                   | Urban       |
| Fargo (2017) <sup>30</sup>      | Adults, veterans                              | Unable to perform screening; Prior engagement w/VHA homeless programs; Nursing home residents         | 5,771,496                                      | VHA, outpatient settings                       | Nationwide                   | Unspecified |
| Montgomery (2020) <sup>55</sup> | Adults, veterans                              | Veterans w/o housing instability                                                                      | 100,022                                        | VHA, outpatient settings                       | Nationwide                   | Varied      |
| Cusack (2020) <sup>44</sup>     | Adults, veterans                              | Veterans w/o housing instability                                                                      | 60                                             | VA medical center, outpatient settings         | “Northeast”                  | Urban       |
| Hassan (2015) <sup>32</sup>     | Adolescents/young adult pts 15-25             | Distressed at time of visit; Unable to comprehend intervention due to language/developmental barriers | 401                                            | Hospital-based adolescent & young adult clinic | Massachusetts                | Urban       |
| Polk (2020) <sup>33</sup>       | Households w/peds pts                         | Non-English or Spanish spkrs                                                                          | 10,916                                         | 8 peds practices                               | “Northeast” & “Mid-Atlantic” | Unspecified |

**Appendix**  
**Social Needs Resource Connections: A Systematic Review of Barriers, Facilitators, and Evaluation**  
**Steeves-Reece et al.**

|                                                                  |                                            |                                                                                           |                                       |                                                                                          |               |       |
|------------------------------------------------------------------|--------------------------------------------|-------------------------------------------------------------------------------------------|---------------------------------------|------------------------------------------------------------------------------------------|---------------|-------|
| Fox (2016) <sup>31</sup>                                         | Caregivers, peds pts                       | Unspecified                                                                               | 116                                   | University peds weight management clinic                                                 | Minnesota     | Urban |
| Fiori (2020) <sup>39</sup>                                       | Caregivers, peds pts                       | Unspecified                                                                               | 4,948 total; 287 analysis of interest | FQHC                                                                                     | New York      | Urban |
| Knowles (2018) <sup>52</sup>                                     | Caregivers, peds pts                       | Unspecified                                                                               | 103 total; 19 qual                    | Children's hospital: 3 peds primary care clinics                                         | Pennsylvania  | Urban |
| Gottlieb (2018) <sup>b 61</sup><br>Gottlieb (2016) <sup>60</sup> | Caregivers, peds pts                       | Families seeking health care for a child w/a severe illness; Non-English or Spanish spkrs | 1,237<br>1,809                        | Urgent care at 2 safety-net hospitals<br>Primary & urgent care at 2 safety-net hospitals | California    | Urban |
| Power-Hays (2019) <sup>34</sup>                                  | Caregivers, peds pts w/sickle cell disease | Unspecified                                                                               | 132                                   | Peds hematology clinic at academic safety-net hospital                                   | Massachusetts | Urban |
| Cullen (2020) <sup>43</sup>                                      | Caregivers, pts <18                        | Those in critical condition; Non-English spkrs; Previously enrolled                       | 40                                    | ED of large children's hospital                                                          | Pennsylvania  | Urban |
| Uwemedimo (2018) <sup>38</sup>                                   | Caregivers, pts <18                        | Unspecified                                                                               | 148                                   | Peds hospital-based primary care practice                                                | New York      | Urban |

**Appendix**  
**Social Needs Resource Connections: A Systematic Review of Barriers, Facilitators, and Evaluation**  
**Steeves-Reece et al.**

|                                     |                                                                                         |                                                                                               |                                       |                                                                          |                |             |
|-------------------------------------|-----------------------------------------------------------------------------------------|-----------------------------------------------------------------------------------------------|---------------------------------------|--------------------------------------------------------------------------|----------------|-------------|
| Emengo (2020) <sup>51</sup>         | Caregivers, peds pts                                                                    | Unspecified                                                                                   | 6                                     | Peds hospital-based primary care practice                                | New York       | Urban       |
| Gottlieb (2020) <sup>58</sup>       | Caregivers, pts <17                                                                     | Pts seen for abuse; Non-English or Spanish spkrs; Enrolled in similar program; in foster care | 611                                   | Peds urgent care clinic at an urban safety-net hospital                  | California     | Urban       |
| Palakshappa (2017a) <sup>b 56</sup> | Caregivers presenting for well-child visits                                             | Unspecified                                                                                   | 4,371 total; 122 analysis of interest | Children's hospital: 6 primary care practices                            | Pennsylvania   | Suburban    |
| Palakshappa (2017b) <sup>48</sup>   |                                                                                         | Did not report food insecurity; Non-English spkrs; Caregivers <18                             | 23                                    |                                                                          |                |             |
| Fritz (2020) <sup>42</sup>          | Caregivers, well-child visits (primary care); Caregivers (Inpatient); Pts w/asthma (ED) | Non-English or Spanish spkrs; Relationship w/social workers; Screened within 6 months         | 5,735 total; 371 analysis of interest | Children's hospital: 2 primary care clinics, 1 inpatient setting, & 1 ED | Colorado       | Varied      |
| Ray (2020) <sup>53</sup>            | Caregivers, pts <5                                                                      | Presenting w/urgent need; Non-English or Spanish spkrs                                        | 146 total; 61 analysis of interest    | Academic peds ED                                                         | Pennsylvania   | Varied      |
| Bottino (2017) <sup>29</sup>        | Caregivers, pts 3-10                                                                    | Pts w/special health needs; Non-English spkrs; Previous screening                             | 340                                   | Peds hospital-based primary care clinic                                  | Massachusetts  | Urban       |
| Orr (2019) <sup>47</sup>            | Caregivers, pts 1-5                                                                     | Pts premature or w/condition affecting their eating or growth; Non-English or Spanish spkrs   | 17                                    | Peds clinic affiliated w/academic medical center                         | North Carolina | Unspecified |

**Appendix**  
**Social Needs Resource Connections: A Systematic Review of Barriers, Facilitators, and Evaluation**  
**Steeves-Reece et al.**

|                           |                         |                                                                                                        |     |        |               |       |
|---------------------------|-------------------------|--------------------------------------------------------------------------------------------------------|-----|--------|---------------|-------|
| Garg (2015) <sup>59</sup> | Caregivers, pts <6 mths | Pts w/special health needs; Non-English or Spanish spkrs; Not pts's mother, mother <18, foster parents | 336 | 8 CHCs | Massachusetts | Urban |
|---------------------------|-------------------------|--------------------------------------------------------------------------------------------------------|-----|--------|---------------|-------|

<sup>a</sup>While some articles included data from non-patient/caregiver participants, this table focuses on patient/caregiver participants for whom relevant outcome data were collected.

<sup>b</sup>Articles by Gottlieb 2016 & 2018 and Palakshappa 2017a & 2017b each came from the same studies (i.e., focusing on the same intervention in the same setting), respectively.

CHC, Community Health Center; ED, Emergency Department; FQHC, Federally Qualified Health Center; KP, Kaiser Permanente; Peds, Pediatric; Pts, Patients; Qual, Qualitative Data; Quant, Quantitative Data; Spkrs, Speakers; VA, Veterans Affairs; VHA, Veterans Health Administration.
